# Supplementary material for: Comparative Study of Sample Carriers for the Identification of Volatile Compounds in Biological Fluids Using Raman Spectroscopy
Source: MDPI journal article supplement (doi:10.3390/molecules27103279), 2022-05-20
Supplement: s1 [file s1]

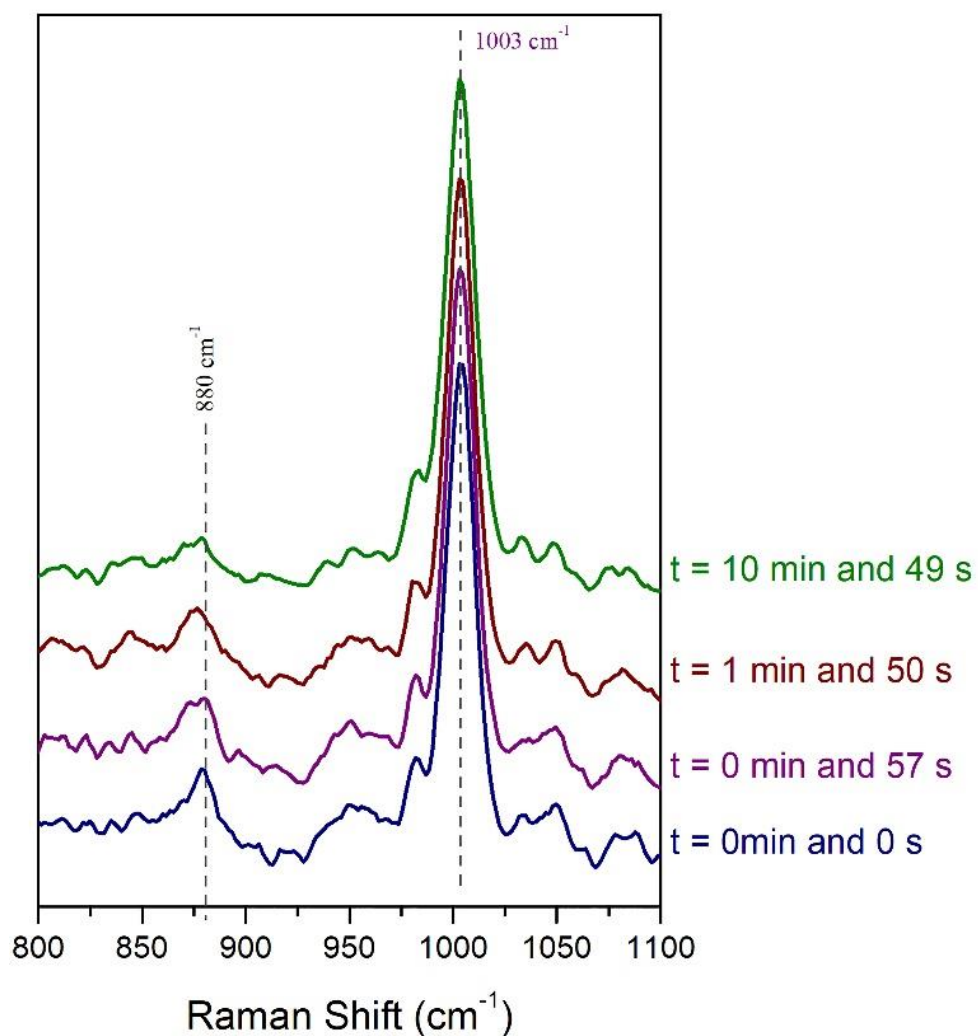

**Figure S1.** Raman spectra of the droplet of a 5  $\mu\text{L/mL}$  ethanolic sample in human urine were acquired immediately ( $t = 0$  min and 0 s) after droplet deposition on the gold coated glass slide, after 0 min and 57 s, 1 min and 50 s and 10 min and 49 s. The Raman spectra are normalized according to the urine peak at  $1003\text{ cm}^{-1}$  and smoothed.

**Table S1.** The rate of change of the ethanol peak to urine peak intensities ratio with respect to time. The sample used consisted of 5  $\mu\text{L/mL}$  ethanol in human urine, and the method used was the deposition of a droplet on gold coated glass slide.

| Time            | Rate of Change (%) |
|-----------------|--------------------|
| 0 min and 0 s   | 0.00               |
| 0 min and 57s   | -8.36              |
| 1 min and 50 s  | -15.64             |
| 10 min and 49 s | -52.67             |

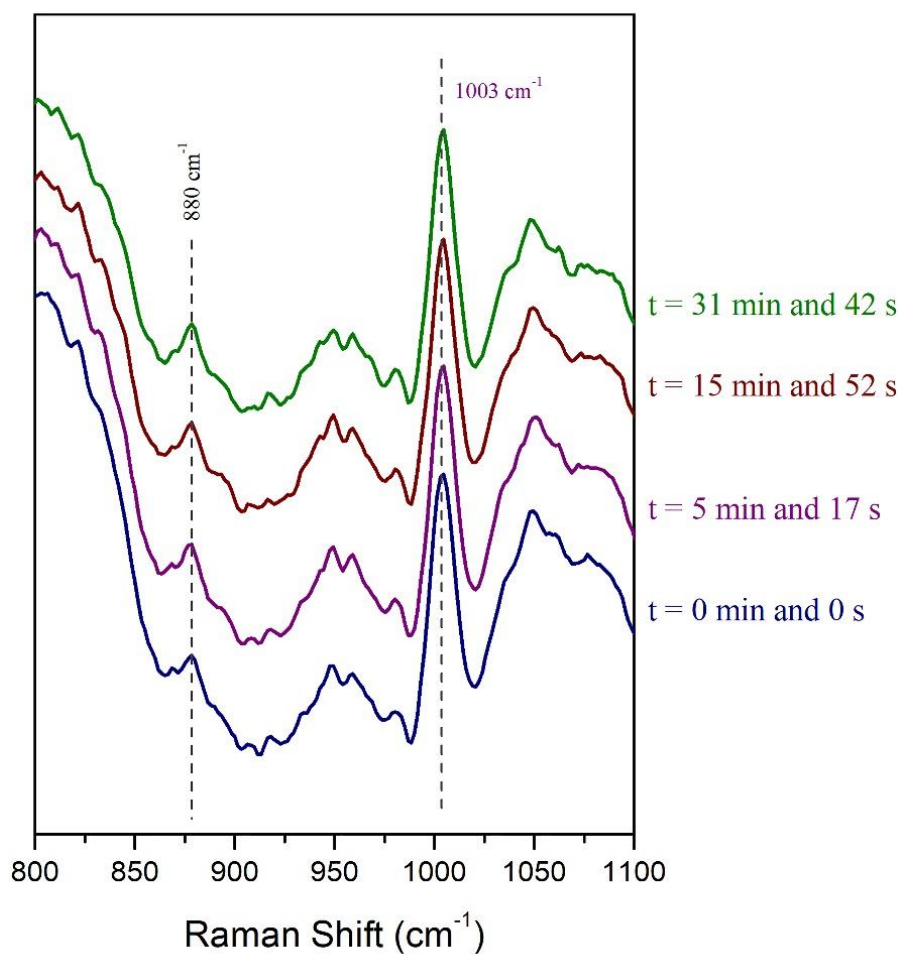

**Figure S2.** Raman spectra of a 5  $\mu\text{L/mL}$  ethanolic sample in human urine were acquired immediately ( $t = 0$  min and 0 s) after placing the sample in the commercially available cuvette for Raman spectroscopy with a mirror on the back side, after 5 min and 17 s, 15 min and 52 s and 31 min and 42 s. The Raman spectra are normalized according to the urine peak at  $1003\text{ cm}^{-1}$  and smoothed.

**Table S2.** The rate of change of the ethanol peak to urine peak intensities ratio with respect to time. The sample used consisted of 5  $\mu\text{L/mL}$  ethanol in human urine, and the method used was the addition of the sample in a commercially available cuvette.

| Time            | Rate of Change (%) |
|-----------------|--------------------|
| 0 min and 0 s   | 0.00               |
| 5 min and 17 s  | -1.35              |
| 15 min and 52 s | -5.42              |
| 31 min and 42 s | -12.28             |

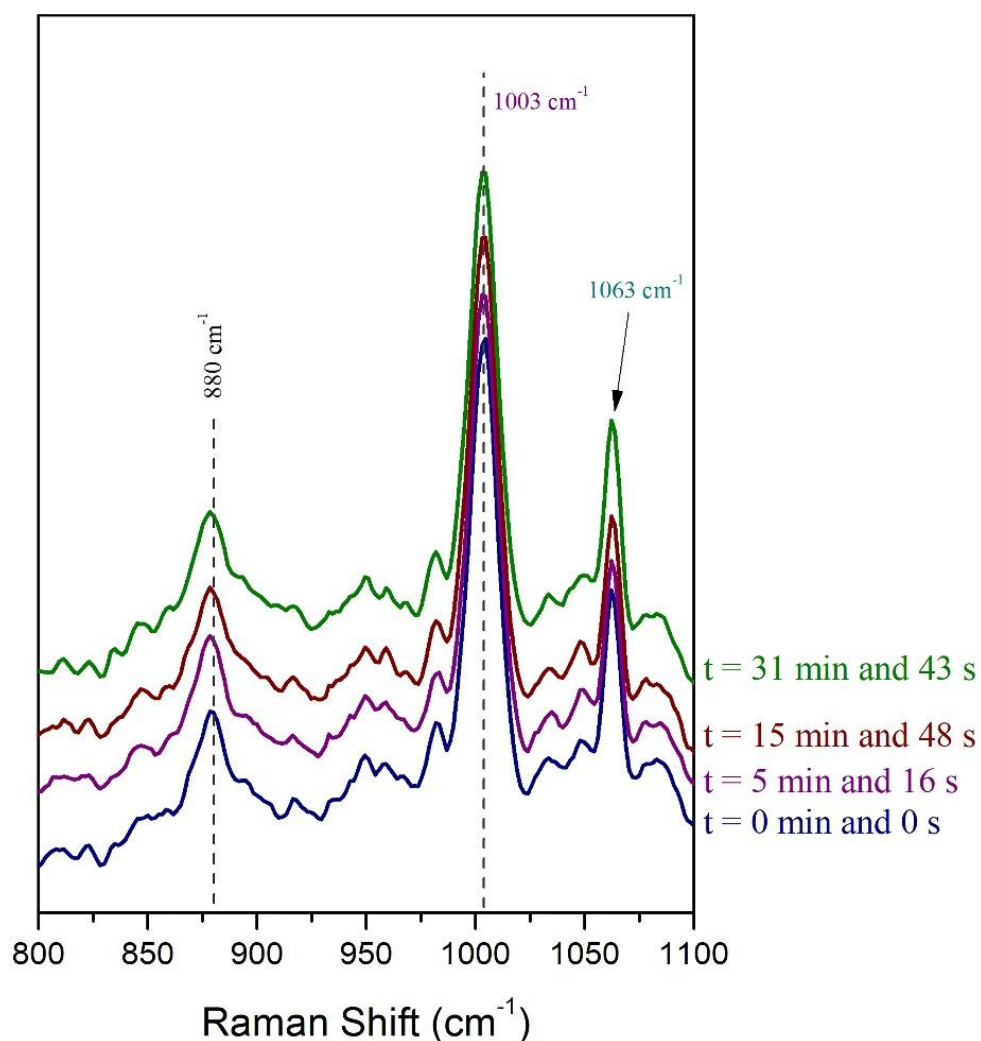

**Figure S3.** Raman spectra of 5  $\mu\text{L/mL}$  ethanol in human urine were acquired immediately ( $t = 0$  min and 0 s) after placing the sample in the cavity of the home designed glass microscope slide coated with a gold highly reflective substrate and covering the sample with a piece of transparent cling film (Vileda Freshmate®), after 5 min and 16 s, 15 min and 48 s and 31 min and 43 s. The Raman spectra are normalized according to the urine peak at  $1003\text{ cm}^{-1}$  and smoothed.

**Table S3.** The rate of change of the ethanol peak to urine peak intensities ratio with respect to time. The sample used consisted of 5  $\mu\text{L/mL}$  ethanol in human urine, and the method used was the deposition of the sample on gold coated glass slide with cavity, covered with transparent cling film.

| Time            | Rate of Change (%) |
|-----------------|--------------------|
| 0 min and 0 s   | 0.00               |
| 5 min and 16 s  | -8.19              |
| 15 min and 48 s | -15.44             |
| 31 min and 43 s | -20.83             |
